# Supplementary material for: Generation of a chemical gradient across an array of 256 cell cultures in a single chip
Source: Royal Society of Chemistry journal article supplement (doi:10.1039/c3an00946g), 2013-01-01
Supplement: c3an00946g.pdf [file c3an00946g.pdf]

### Supporting information

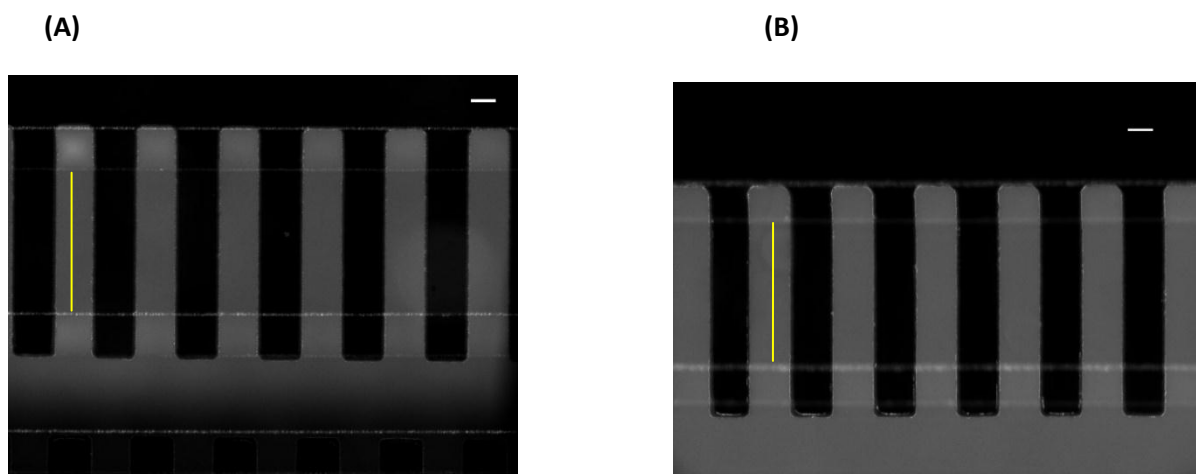

**Fig. 4:** (A) Epifluorescence microscopy image of part upper channels of the device after flowing fluorescein and PBS buffer for 90 min. Plot profile along the line showing in yellow color was taken using Image J and analyzed using origin. Standard deviation for the gradient along the channels is 4.9%. (B) Epifluorescence microscopy image of part upper channels of the device after flowing only fluorescein ( $1.4 \mu\text{M}$ ). Same analysis was performed and found out standard deviation for the gradient along the channels is 4.8%.

**Table 1:** Predicted concentration values for gradient in microfluidic diffusion diluter using COMSOL multiphysics.

| Channel number | Simulation values for Concentration |
|----------------|-------------------------------------|
| 1              | 0.841637                            |
| 2              | 0.819076                            |
| 3              | 0.804275                            |
| 4              | 0.79234                             |
| 5              | 0.781803                            |
| 6              | 0.772145                            |
| 7              | 0.763132                            |
| 8              | 0.754633                            |
| 9              | 0.746558                            |
| 10             | 0.738847                            |
| 11             | 0.731455                            |
| 12             | 0.724346                            |
| 13             | 0.717496                            |
| 14             | 0.710882                            |
| 15             | 0.704489                            |
| 16             | 0.698303                            |
| 17             | 0.692314                            |
| 18             | 0.686511                            |
| 19             | 0.680886                            |
| 20             | 0.675432                            |
| 21             | 0.670143                            |
| 22             | 0.665012                            |
| 23             | 0.660035                            |
| 24             | 0.655205                            |
| 25             | 0.650519                            |
| 26             | 0.645971                            |
| 27             | 0.641558                            |
| 28             | 0.637275                            |
| 29             | 0.633117                            |
| 30             | 0.629083                            |
| 31             | 0.625167                            |
| 32             | 9.447236                            |
| 33             | 0.617676                            |
| 34             | 0.610618                            |

|    |          |
|----|----------|
| 35 | 0.603967 |
| 36 | 0.597699 |
| 37 | 0.59179  |
| 38 | 0.58622  |
| 39 | 0.580969 |
| 40 | 0.576016 |
| 41 | 0.571343 |
| 42 | 0.566935 |
| 43 | 0.562775 |
| 44 | 0.558847 |
| 45 | 0.555139 |
| 46 | 0.551635 |
| 47 | 0.548324 |
| 48 | 0.545193 |
| 49 | 0.542233 |
| 50 | 0.539431 |
| 51 | 0.538086 |
| 52 | 0.536778 |
| 53 | 0.535504 |
| 54 | 0.534265 |
| 55 | 0.533058 |
| 56 | 0.531882 |
| 57 | 0.530738 |
| 58 | 0.529623 |
| 59 | 0.528536 |
| 60 | 0.527478 |
| 61 | 0.526446 |
| 62 | 0.52544  |
| 63 | 0.524459 |
| 64 | 0.523502 |
| 65 | 0.522569 |
| 66 | 0.521659 |
| 67 | 0.52077  |
| 68 | 0.519902 |
| 69 | 0.519055 |
| 70 | 0.518228 |
| 71 | 0.517419 |
| 72 | 0.516629 |
| 73 | 0.515857 |
| 74 | 0.515102 |
| 75 | 0.514363 |

|    |          |
|----|----------|
| 76 | 0.51364  |
| 77 | 0.512933 |
| 78 | 0.51224  |
| 79 | 0.511561 |
| 80 | 0.510897 |
| 81 | 0.510245 |
| 82 | 0.509606 |
| 83 | 0.508979 |
| 84 | 0.50776  |
| 85 | 0.506585 |
| 86 | 0.505449 |
| 87 | 0.50435  |
| 88 | 0.503284 |
| 89 | 0.50225  |
| 90 | 0.501243 |
| 91 | 0.500261 |
| 92 | 0.499302 |
| 93 | 0.498364 |
| 94 | 0.497444 |
| 95 | 0.496542 |
| 96 | 0.495686 |

**Table 2: Values of parameters used in simulations**

**Equations used-**  $\mu u(x, y) = ((h/2)^2 - y^2) \frac{\partial P}{\partial x}$

$$\frac{\partial C}{\partial t} = \nabla(D_1 \nabla C) + u \frac{\partial C}{\partial x}$$

| Parameters                       | Values                                                |
|----------------------------------|-------------------------------------------------------|
| <b>Diffusion coefficient (D)</b> | <b>0.1</b>                                            |
| <b>h</b>                         | <b>0.3</b>                                            |
| <b>DeltaP</b>                    | <b>1000</b>                                           |
| <b>velocity</b>                  | <b>(0.15<sup>2</sup>-(y+0.25)<sup>2</sup>)*DeltaP</b> |
